# Supplementary material
Source: Springer Nature journal article supplement (https://www.springermedizin.de/resource/supplementary/13098_2013_307_MOESM1_ESM.pdf/9671048)

**A**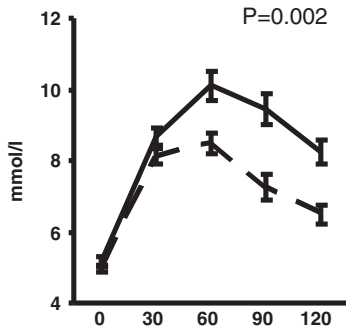**B**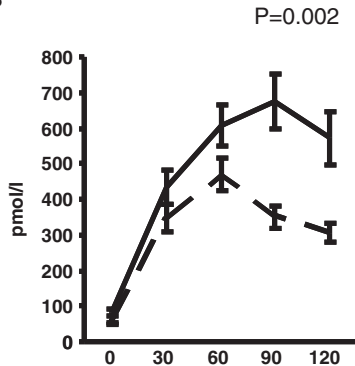**C**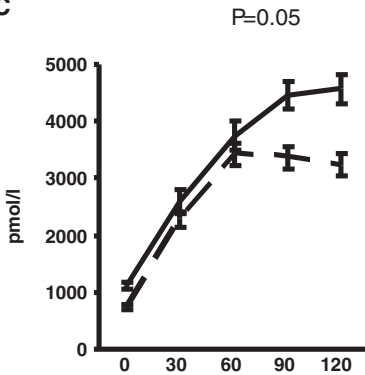

Supplement: MOESM1 [file 9671048]
